# Supplementary material for: MALDI Imaging, a Powerful Multiplex Approach to Decipher Intratumoral Heterogeneity: Combined Hepato-Cholangiocarcinomas as Proof of Concept
Source: MDPI journal article supplement (doi:10.3390/cancers15072143), 2023-04-04
Supplement: s1 [file s1]

## Supplementary materials

Supplementary Table S1: Immunohistochemistry list

| Anticorps anti- | Dilution | Clonality    | Supplier   | Reference |
|-----------------|----------|--------------|------------|-----------|
| CK7             | 1/500    | 50V-TL 12/30 | DAKO       | M7018     |
| CK19            | 1/200    | RCK108       | DAKO       | M0888     |
| Glypican-3      | 1/100    | 1G12         | Zytomed    | MSK067-05 |
| EpCam Ber-EP4   | 1/50     | Ber-EP4      | DAKO       | M0804     |
| Nestin          | 1/500    | 10c2         | Santa Cruz | sc-23927  |

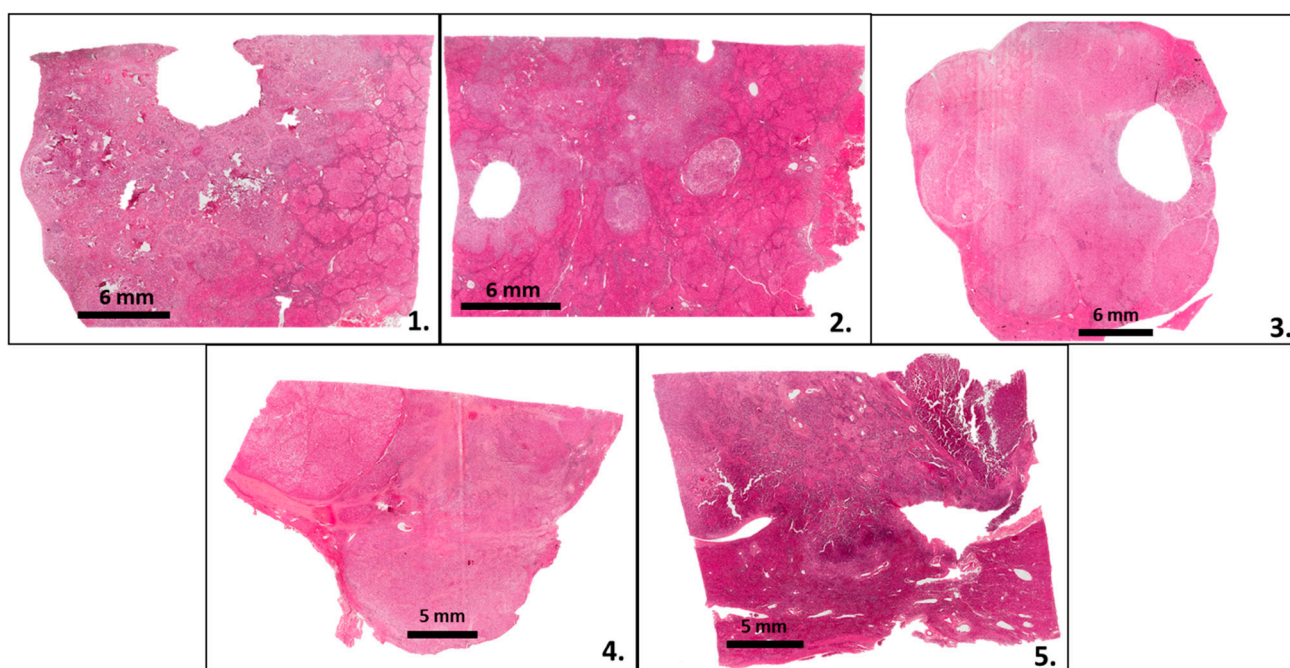

Supplementary Figure S1: Hematein Eosin Safran (HES) staining of the five cases.

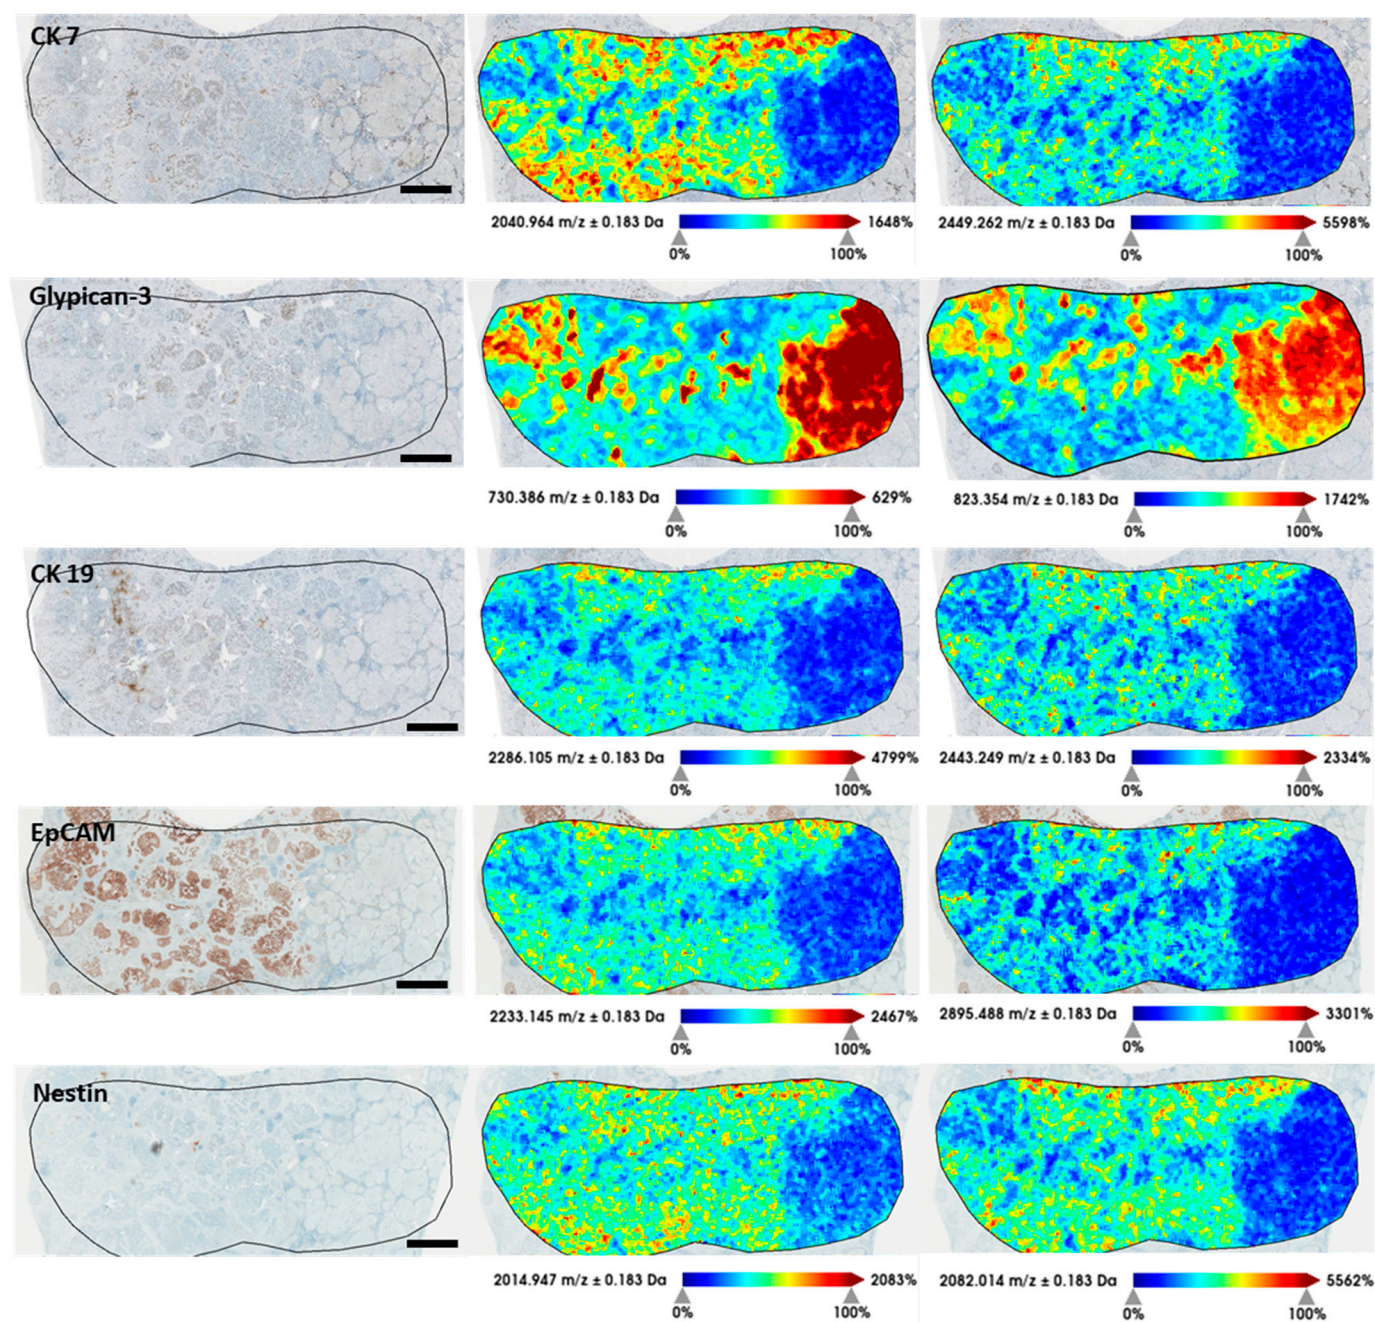

Supplementary Figure S2: Comparison of a selection of tryptic peptides derived from current IHC markers and the corresponding IHC for the patient 1. Scale bar = 3 mm.



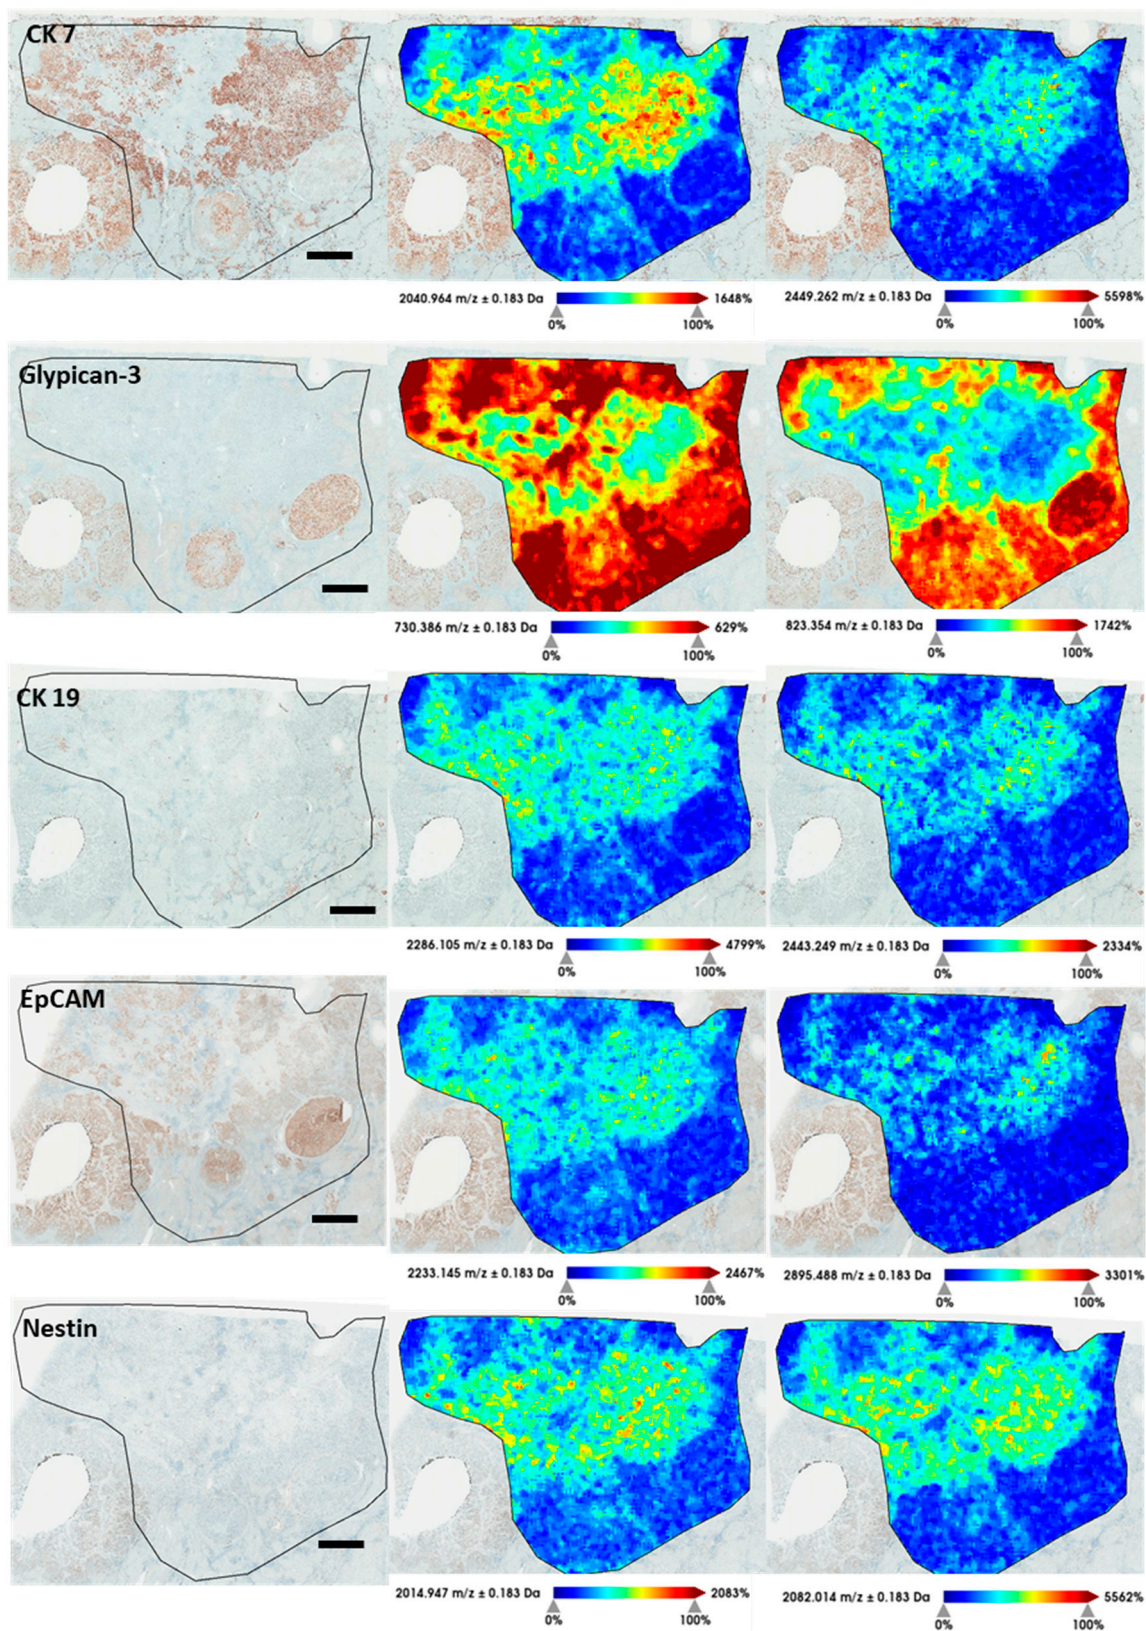

Supplementary Figure S3: Comparison of a selection of tryptic peptides derived from current IHC markers and the corresponding IHC for the patient 2. Scale bar = 2 mm.



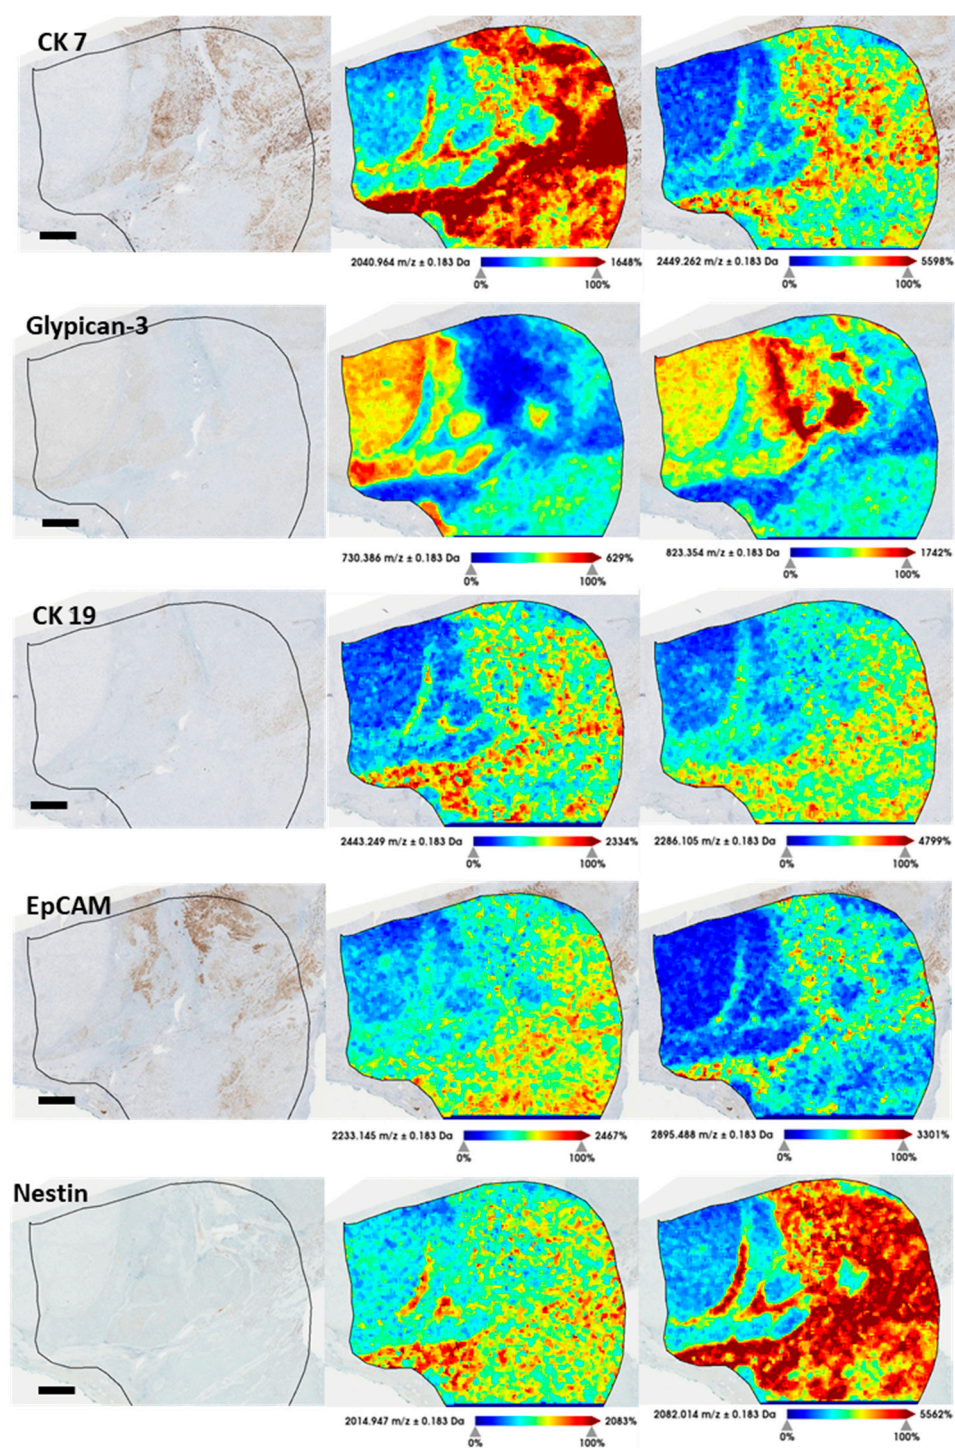

Supplementary Figure S4: Comparison of a selection of tryptic peptides derived from current IHC markers and the corresponding IHC for the patient 4. Scale bar = 2 mm.



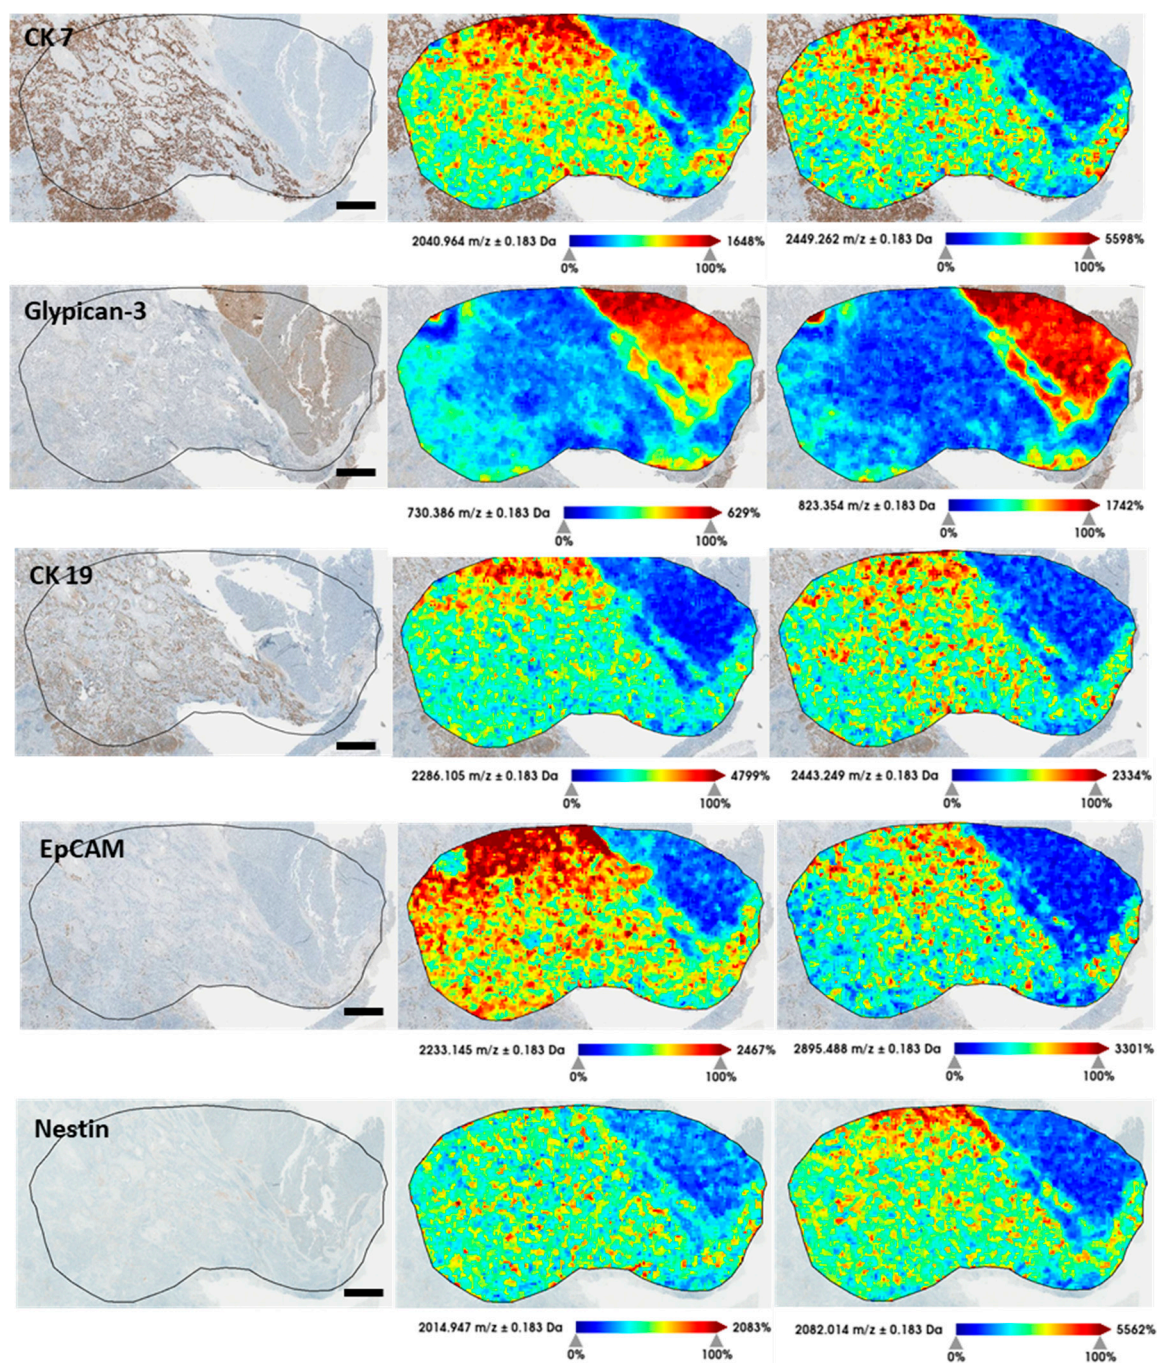

Supplementary Figure S5: Comparison of a selection of tryptic peptides derived from current IHC markers and the corresponding IHC for the patient 5. Scale bar = 2 mm.

Supplementary Table S2: *in silico* digested peptides

|              | Sequences                   | theo m/z  | exp m/z  | delta   |
|--------------|-----------------------------|-----------|----------|---------|
| <b>CK7</b>   | EVTINQSLLAPRLRDADPSLQR      | 2449,3409 | 2449,262 | 0,0789  |
|              | SIHFSSPVFTSRSAAFSGR         | 2041,025  | 2040,964 | 0,061   |
| <b>CK19</b>  | MTSYSYRQSSATSSFGGLGGGSVR    | 2443,1306 | 2443,249 | -0,1184 |
|              | EVAGHTEQLQMSRSEVTDLR        | 2286,1142 | 2286,105 | 0,0092  |
| <b>EpCam</b> | AKPEGALQNNGLYDPDCDE SGLFKAK | 2895,3465 | 2895,488 | -0,1415 |

|            |                      |           |          |         |
|------------|----------------------|-----------|----------|---------|
|            | TQNDVDIADVAYYFEKDVK  | 2233,0659 | 2233,145 | -0,0791 |
| Nestin     | EGWDPAVLASEGLEAPPSEK | 2082,0025 | 2082,014 | -0,0115 |
|            | EEVMEPPLEESLEAKR     | 2014,9637 | 2014,947 | 0,0167  |
| Glypican 3 | YSQKAAR              | 823,4421  | 823,354  | 0,0881  |
|            | IWHFK                | 730,4035  | 730,386  | 0,0175  |

## Mascot Score Histogram

Protein score is  $-10 \cdot \log(P)$ , where P is the probability that the observed match is a random event. Protein scores greater than 56 are significant ( $p < 0.05$ ).

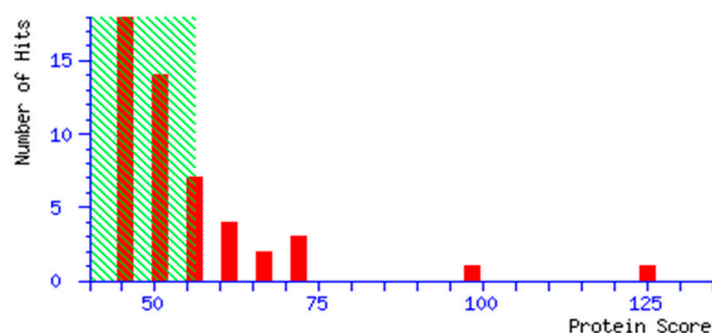

Supplementary Figure S6: Mascot Score Histogram. In the green area the proteins that were not reliably associated with the peptide list.
